# Supplementary material for: Failure to breathe persists without air hunger or alarm following amygdala seizures
Source: JCI journal article supplement (doi:10.1172/jci.insight.172423), 2023-10-03
Supplement: sd1 [file 1]

***Supplement: Failure to breathe persists without air hunger or alarm following amygdala seizures***

Gail I. S. Harmata<sup>1,2,3,4,5,6</sup> †, Ariane E. Rhone<sup>1,2</sup> †, Christopher K. Kovach<sup>1,2</sup>, Sukhbinder Kumar<sup>1</sup>, Md Rakibul Mowla<sup>1</sup>, Rup K. Sainju<sup>7</sup>, Yasunori Nagahama<sup>1</sup> ‡, Hiroyuki Oya<sup>1,2</sup>, Brian K. Gehlbach<sup>8</sup>, Michael A. Ciliberto<sup>9</sup>, Rashmi N. Mueller<sup>1,10</sup>, Hiroto Kawasaki<sup>1</sup>, Kyle T.S. Pattinson<sup>11</sup>, Kristina Simonyan<sup>12</sup>, Paul W. Davenport<sup>13</sup>, Matthew A. Howard III<sup>1,2,3</sup>, Mitchell Steinschneider<sup>14</sup>, Aubrey C. Chan<sup>6,8</sup>, George B. Richerson<sup>2,3,4,7,15,16</sup>, John A. Wemmie<sup>1,2,3,4,6,8,14,16</sup>, Brian J. Dlouhy<sup>1,2,3</sup>\*

**Affiliations:**

<sup>1</sup>Department of Neurosurgery, University of Iowa; Iowa City, IA 52242, USA. <sup>2</sup>Iowa Neuroscience Institute, University of Iowa; Iowa City, IA 52242, USA. <sup>3</sup>Pappajohn Biomedical Institute, University of Iowa; Iowa City, IA 52242, USA. <sup>4</sup>Interdisciplinary Graduate Program in Neuroscience, University of Iowa; Iowa City, IA 52242, USA. <sup>5</sup>Pharmacological Sciences Training Program, University of Iowa; Iowa City, IA 52242, USA. <sup>6</sup>Department of Psychiatry, University of Iowa; Iowa City, IA 52242, USA.

<sup>7</sup>Department of Neurology, University of Iowa; Iowa City, IA 52242, USA. <sup>8</sup>Department of Internal Medicine, University of Iowa; Iowa City, IA 52242, USA. <sup>9</sup>Department of Pediatrics, University of Iowa; Iowa City, IA 52242, USA. <sup>10</sup>Department of Anesthesia, University of Iowa; Iowa City, IA 52242, USA.

<sup>11</sup>Nuffield Department of Clinical Neurosciences, University of Oxford, John Radcliffe Hospital; Oxford, OX3 9DU, UK. <sup>12</sup>Department of Otolaryngology – Head and Neck Surgery, Massachusetts Eye and Ear and Harvard Medical School; Boston, MA 02114, USA. <sup>13</sup>Department of Physiological Sciences, University of Florida; Gainesville, FL 32610, USA. <sup>14</sup>Department of Neurology, Albert Einstein College of Medicine; Bronx, NY 10461, USA. <sup>15</sup>Department of Molecular Physiology and Biophysics, University of Iowa; Iowa City, IA 52242, USA. <sup>16</sup>Department of Veterans Affairs Medical Center; Iowa City, IA 52246, USA.

**\*Corresponding author:**

Brian J. Dlouhy, Department of Neurosurgery, University of Iowa Carver College of Medicine, University of Iowa Stead Family Children's Hospital, 200 Hawkins Drive, Iowa City, Iowa 52242, USA. Phone: 319.356.2542; Email: brian-dlouhy@uiowa.edu.

† Co-first authors

‡ Current affiliation: Department of Neurosurgery, Robert Wood Johnson Medical School, Rutgers University; New Brunswick, NJ 08901, USA.

**Supplemental Contents:**

*Supplemental Methods*

*Supplemental Table 1: MNI Coordinates of Stimulated Sites*

## ***Supplemental Methods***

### *Imaging and electrode Localization*

For each patient, whole-brain high-resolution T1-weighted structural MR scans (resolution and slice thickness  $\leq 1.0$  mm) were obtained before and after electrode implantation. Post-implantation CT and 3T MR structural scans were linearly coregistered to pre-implantation MR scans using the FLIRT module of FSL [1]. These images were corrected manually for displacement and deformation from surgery using nonlinear thin-plate spline warping using manually selected control points. Finally, FreeSurfer was used to identify the cortical surface and white/gray boundaries within pre-implantation T1 images, which were corrected manually based on visual inspection where necessary.

### *Amygdala nuclei parcellation*

Eight amygdala nuclei were delineated according to the probabilistic atlas of Tyszka and Pauli [2], and the structural relationships between electrode contacts and nuclei were determined from the projected contact locations within the preoperative T1 image space as described previously [3]. The nuclei included: lateral, basolateral, basomedial, central, and cortical/medial as well as amygdala transition areas, amygdalostratial transition area, and anterior amygdala area. This atlas used to delineate amygdala subregions [2] provides more accurate external boundary definition than what has previously been estimated with histology-based atlases in humans or other nuclei parcellations from other sources. This atlas has been used in numerous publications validating its use across human studies and has been cited more than 100 times since its publication in 2016.

### *Respiratory Monitoring Equipment*

Oral and nasal airflow at bedside were measured with a BiNAPS nasal pressure transducer and a ThermiSense oral/nasal thermistor (SunMed, Grand Rapids, MI). Chest and abdominal excursions were recorded using plethysmography belts (ProTech zRIP). Arterial oxygen saturation ( $\text{SpO}_2$ ) was recorded using a BluPro  $\text{SpO}_2$  monitor. In the operating room, respiratory monitoring was evaluated using an Aisys Carestation with B850 monitor (GE/Datex-Ohmeda, Inc.), which allowed for real-time anesthesia and respiratory evaluation of respiratory rate, tidal volume, minute ventilation, and  $\text{etCO}_2$ . This was video recorded for later evaluation.

### *Analysis of iEEG power*

Time-frequency analysis of iEEG data was performed by first filtering the data into narrow frequency bands with center frequencies ranging from 1 to 150 Hz in steps of 1 Hz. Filtering was done by convolving the data with Gaussian kernel with width-at-half-maximum set to 5. Signal power for each frequency band was calculated by taking the square of the amplitude envelope computed using the Hilbert transform. To test if there was a significant change in iEEG power after stimulation, the frequency range was divided into 6 bands: delta (1-4Hz); theta (4-8 Hz); alpha (8-12 Hz); beta (12-30Hz); low gamma (30-80Hz) and high gamma (80-150Hz) and change in average (over time) power for each of the frequency bands was calculated with respect to a baseline of 30 s before the stimulation onset. The power changes were then subjected to statistical analysis using Wilcoxon rank sum test (Matlab function: ranksum) to test if the changes were significantly different from zero. To test if the breathing pattern after stimulation onset correlated with fluctuations in power in any of the frequency bands, the breathing trace was first low pass filtered to 1 Hz followed by calculation of the amplitude envelope using the Hilbert transform. The correlation coefficient between the amplitude envelope of breathing and the amplitude envelope of each of the frequency bands was calculated both during the post-stimulation period and

during a baseline period of 30 s before stimulation onset. Changes in correlation coefficient with respect to baseline were then subjected to statistical analysis using Wilcoxon rank sum test as above.

#### *Machine Learning - Classifier Analysis*

Classifier analysis (Figure 4, main text) was performed multi-class error correcting output code (ECOC) classifier [4]. ECOC classifiers adapt binary classifiers to multiway classification by fitting multiple redundant binary classifiers across binary subgroupings of the outcome categories and treating the combined output of all classifiers as an error correcting code, where each classifier contributes one bit of information. The predicted class for a given input is obtained according to the minimum of a distance metric between the combined binary classifier outputs and binary values encoding the respective classes. Binary classifiers in the present application were 4 kernel support vector machines (SVM), each trained to distinguish one outcome class from all others with the midpoint between cathode and anode coordinates in MNI space as the predictor, using a 6.7 mm FWHM Gaussian spatial kernel. Posterior class probabilities were estimated with 10-fold cross validation, and the distance metric used in class prediction was quadratic loss with respect to the estimated posterior probabilities across binary classifiers. Classifiers were specified and fit using, respectively, the Matlab functions, “templateSVM”, and “fitcecoc,” contained in the Matlab Statistics and Machine Learning Toolbox.

#### *Electrical stimulation concurrent with fMRI (es-fMRI)*

fMRI data were acquired during stimulation on a 3T Siemens Skyra scanner with the following parameters: TR = 3 s; TE = 30 ms; voxel size = 3 cubic mm isotropic; delay between successive volume acquisitions = 100 ms. Electrical stimulation was done during the delay between scans. Bipolar, biphasic electrical stimulation was conducted using an isolated biphasic stimulus generator (A-M Systems, Sequim, WA, USA). A pre-electrode implantation T1-weighted anatomical MRI scan was acquired with the following parameters: 32 channel head coil, TR = 8.588 ms; TE = 3.376 ms; Flip angle = 12 degrees; voxel size = 1.0 x 1.0 x 0.8 mm. Further details of the data acquisition can be found in Thompson et al.[5].

Pre-processing of the fMRI data was done using the standard fMRIPrep pipeline [6]. After correction for intensity non-uniformity, the anatomical T1w scan was skull-stripped and segmented into gray matter, white matter, and cerebrospinal fluid. The anatomical scan was then normalized to MNI space through nonlinear registration with a T1w template. The fMRI data were pre-processed using the following steps: i) generation of a reference volume from the data collected in one session; ii) field correction using fMRIPrep’s fieldmap-less approach; (iii) head-motion correction and estimation of motion parameters; (iv) co-registration of the BOLD reference with the anatomical scan; (v) slice-time correction; (vi) normalization to MNI space; and (vii) smoothing with a Gaussian kernel of 8mm FWHM (full-width-at-half-maximum). More details of the pre-processing can be found in Thompson et al.[5].

#### *Statistical analysis of es-fMRI*

Onset times of electrical stimulation pulses were entered as events and then convolved with the canonical hemodynamic response function. In addition, the design matrix consisted of the following 22 nuisance regressors: (i) 6 motion parameters; (ii) 6 first derivative of the motion parameters; (iii) 8 RETROICOR regressors (up to 4<sup>th</sup> harmonic) of the respiration trace [7]; (iv) 1 respiratory volume time (RVT) regressor modelling change in respiration rate or depth over time [8]; and (v) 1 regressor for removing linear trend in the data. A high-pass filter of 1/128 Hz was applied to remove low frequency fluctuations in the BOLD signal. After the GLM model was estimated, two contrasts (Stimulation ON > Stimulation OFF and Stimulation OFF > Stimulation ON) were estimated. Clusters of activations were determined using a peak

voxel threshold of  $p=0.001$  with (cluster) extent threshold of 30 voxels. BOLD time series from the insula and brain stem clusters (Figure 7E, main text) were computed using principal component analysis of voxels in the cluster and retaining the first principal component ('eigenvariate' function in the SPM toolbox) after adjusting for nuisance regressors. The t-values for the brain stem and insula clusters (Figure 7I, main text) corresponded to the maxima of cluster in the first-level t-maps.

1. Jenkinson, M. and S. Smith, *A global optimisation method for robust affine registration of brain images*. Med Image Anal, 2001. **5**(2): p. 143-56.
2. Tyszka, J.M. and W.M. Pauli, *In vivo delineation of subdivisions of the human amygdaloid complex in a high-resolution group template*. Hum Brain Mapp, 2016. **37**(11): p. 3979-3998.
3. Rhone, A.E., et al., *A human amygdala site that inhibits respiration and elicits apnea in pediatric epilepsy*. JCI Insight, 2020. **5**: p. e134852.
4. Dietterich, T.G. and G. Bakiri, *Solving Muticlass Learning Problems via Error-Correcting Output Codes*. J Artificial Intelligence Research, 1995. **2**: p. 263-286.
5. Thompson, W.H., et al., *A data resource from concurrent intracranial stimulation and functional MRI of the human brain*. Scientific Data, 2020. **7**(1): p. 258.
6. Esteban, O., et al., *fMRIPrep: a robust preprocessing pipeline for functional MRI*. Nat Methods, 2019. **16**(1): p. 111-116.
7. Glover, G.H., T.Q. Li, and D. Ress, *Image-based method for retrospective correction of physiological motion effects in fMRI: RETROICOR*. Magn Reson Med., 2000. **44**(1): p. 162-7.
8. Birn, R.M., et al., *The respiration response function: the temporal dynamics of fMRI signal fluctuations related to changes in respiration*. NeuroImage, 2008. **40**(2): p. 644-654.

**Supplemental Table 1: MNI Coordinates of Stimulated Sites**

| Patient | AgeGroup  | Effect           | X1     | Y1     | Z1     | X2     | Y2     | Z2     | SiteX* | SiteY   | SiteZ   | Site Nucleus/ROI |
|---------|-----------|------------------|--------|--------|--------|--------|--------|--------|--------|---------|---------|------------------|
| 206     | adult     | Apnea            | 23.77  | -3.07  | -22.26 | 33.33  | -3.31  | -23.86 | 28.55  | -3.19   | -23.06  | BL/LA            |
| 210     | adult     | Apnea            | -12.07 | -5.45  | -17.81 | -23.85 | -4.92  | -17.38 | 17.96  | -5.185  | -17.595 | ATA/CMN/BM/BL    |
| 210     | adult     | Apnea            | 24.88  | -5.23  | -25.08 | 38.99  | -2.36  | -26.41 | 31.935 | -3.795  | -25.745 | LA               |
| 210     | adult     | No effect        | 38.99  | -2.36  | -26.41 | 43.57  | -1.72  | -22.98 | 41.28  | -2.04   | -24.695 | WM               |
| 352     | adult     | No effect        | -16.88 | -1.81  | -26.09 | -27.34 | 0.05   | -30.24 | 22.11  | -0.88   | -28.165 | BL/LA            |
| 352     | adult     | No effect        | -27.34 | 0.05   | -30.24 | -36.43 | 1.48   | -29.27 | 31.885 | 0.765   | -29.755 | WM               |
| 352     | adult     | Persistent Apnea | 16.14  | -3.21  | -21.66 | 27.28  | -3.93  | -21.23 | 21.71  | -3.57   | -21.445 | BL/LA            |
| 352     | adult     | No effect        | 27.28  | -3.93  | -21.23 | 37.04  | -6     | -20.01 | 32.16  | -4.965  | -20.62  | LA/WM            |
| 357     | adult     | Apnea            | -22.75 | -5.2   | -27.25 | -27.93 | -4.77  | -26.49 | 25.34  | -4.985  | -26.87  | LA               |
| 357     | adult     | No effect        | -27.93 | -4.77  | -26.49 | -32.19 | -4.85  | -26.85 | 30.06  | -4.81   | -26.67  | LA/WM            |
| 372     | adult     | No effect        | -28.91 | -34.9  | -12.68 | -31.19 | -31.07 | -12.04 | 30.05  | -32.985 | -12.36  | Hipp             |
| 372     | adult     | No effect        | -14.96 | -10.43 | -22.01 | -19.83 | -8.48  | -21.78 | 17.395 | -9.455  | -21.895 | Hipp/BL          |
| 372     | adult     | Apnea            | -19.83 | -8.48  | -21.78 | -24.07 | -7.44  | -22.06 | 21.95  | -7.96   | -21.92  | BL               |
| 372     | adult     | No effect        | -24.07 | -7.44  | -22.06 | -28.62 | -6.16  | -21.96 | 26.345 | -6.8    | -22.01  | BL/LA            |
| 372     | adult     | No effect        | -28.62 | -6.16  | -21.96 | -33.54 | -5     | -21.67 | 31.08  | -5.58   | -21.815 | LA/WM            |
| 372     | adult     | No effect        | -33.54 | -5     | -21.67 | -38.88 | -3.3   | -20.28 | 36.21  | -4.15   | -20.975 | WM               |
| 381     | pediatric | Apnea            | -16.03 | -0.95  | -22.28 | -19.46 | -0.37  | -22.41 | 17.745 | -0.66   | -22.345 | ATA/BL/BM        |
| 381     | pediatric | Apnea            | -19.46 | -0.37  | -22.41 | -23.49 | -0.2   | -22.63 | 21.475 | -0.285  | -22.52  | BL               |
| 381     | pediatric | No effect        | -23.49 | -0.2   | -22.63 | -27.61 | -0.16  | -22.97 | 25.55  | -0.18   | -22.8   | LA               |
| 381     | pediatric | No effect        | -27.61 | -0.16  | -22.97 | -32.42 | 0.07   | -23.21 | 30.015 | -0.045  | -23.09  | LA               |
| 381     | pediatric | No effect        | -32.42 | 0.07   | -23.21 | -36.29 | -1.02  | -23.29 | 34.355 | -0.475  | -23.25  | WM               |
| 384     | adult     | Persistent Apnea | -18.12 | -1.08  | -21.2  | -28.4  | 1.41   | -20.71 | 23.26  | 0.165   | -20.955 | BM/BL/LA         |
| 384     | adult     | No effect        | -28.4  | 1.41   | -20.71 | -36.92 | 4.1    | -19.2  | 32.66  | 2.755   | -19.955 | LA/WM            |
| 384     | adult     | No effect        | 10.63  | 5.77   | -17.7  | 21.13  | 7.66   | -17.42 | 15.88  | 6.715   | -17.56  | orbitofrontal    |
| 384     | adult     | No effect        | 26.77  | -29.3  | -14.72 | 33.82  | -20.61 | -14.24 | 30.295 | -24.955 | -14.48  | Hipp             |
| 384     | adult     | No effect        | 33.82  | -20.61 | -14.24 | 40.06  | -11.81 | -15.4  | 36.94  | -16.21  | -14.82  | Hipp/WM          |
| 384     | adult     | Transient Apnea  | 23.18  | -10.44 | -11.2  | 32.88  | -13.29 | -8.52  | 28.03  | -11.865 | -9.86   | CMN/WM           |
| 384     | adult     | Transient Apnea  | 19.58  | -4.32  | -22.89 | 24.9   | -2.59  | -23.63 | 22.24  | -3.455  | -23.26  | BL/LA            |
| 384     | adult     | No effect        | 24.9   | -2.59  | -23.63 | 30.3   | -0.81  | -23.34 | 27.6   | -1.7    | -23.485 | LA               |
| 384     | adult     | No effect        | 30.3   | -0.81  | -23.34 | 35.22  | 0.22   | -22.98 | 32.76  | -0.295  | -23.16  | LA/WM            |
| 384     | adult     | No effect        | 35.22  | 0.22   | -22.98 | 40.97  | 1.1    | -21.12 | 38.095 | 0.66    | -22.05  | WM               |
| 394     | adult     | No effect        | 6.66   | 15.5   | -20.04 | 17.69  | 12.18  | -19.54 | 12.175 | 13.84   | -19.79  | orbitofrontal    |
| 394     | adult     | No effect        | 51.36  | -17.71 | -5.18  | 56.16  | -15.19 | -7.76  | 53.76  | -16.45  | -6.47   | WM               |
| 394     | adult     | Apnea            | 18.19  | -8.31  | -23.71 | 20.89  | -8.45  | -23.83 | 19.54  | -8.38   | -23.77  | BL               |
| 394     | adult     | Apnea            | 23.6   | -8.63  | -24.1  | 26.26  | -8.66  | -24.23 | 24.93  | -8.645  | -24.165 | BL/LA            |
| 394     | adult     | Apnea            | 26.26  | -8.66  | -24.23 | 28.75  | -8.53  | -24.17 | 27.505 | -8.595  | -24.2   | LA               |
| 394     | adult     | No effect        | 28.75  | -8.53  | -24.17 | 31.08  | -8.31  | -24.14 | 29.915 | -8.42   | -24.155 | LA               |
| 395     | pediatric | No effect        | -22.25 | -32.46 | -10.59 | -27.32 | -31.01 | -10.14 | 24.785 | -31.735 | -10.365 | Hipp             |
| 395     | pediatric | No effect        | -27.32 | -31.01 | -10.14 | -32.91 | -29.9  | -9.33  | 30.115 | -30.455 | -9.735  | Hipp             |
| 395     | pediatric | No effect        | -10.27 | -1.81  | -22.19 | -12.29 | -2.13  | -21.24 | 11.28  | -1.97   | -21.715 | ATA/CMN          |

|     |           |                  |        |        |        |        |        |        |        |         |         |                        |
|-----|-----------|------------------|--------|--------|--------|--------|--------|--------|--------|---------|---------|------------------------|
| 395 | pediatric | Apnea            | -12.29 | -2.13  | -21.24 | -14.56 | -2.41  | -20.51 | 13.425 | -2.27   | -20.875 | ATA/CMN/BM             |
| 395 | pediatric | Apnea            | -14.56 | -2.41  | -20.51 | -16.69 | -2.84  | -19.78 | 15.625 | -2.625  | -20.145 | BM                     |
| 395 | pediatric | Apnea            | -16.69 | -2.84  | -19.78 | -19.52 | -3.19  | -19.65 | 18.105 | -3.015  | -19.715 | BM/BL                  |
| 395 | pediatric | Apnea            | -19.52 | -3.19  | -19.65 | -22.42 | -3.52  | -19.95 | 20.97  | -3.355  | -19.8   | BL/LA                  |
| 395 | pediatric | Transient Apnea  | -22.42 | -3.52  | -19.95 | -25.08 | -4.06  | -20.26 | 23.75  | -3.79   | -20.105 | LA                     |
| 395 | pediatric | Transient Apnea  | -25.08 | -4.06  | -20.26 | -27.49 | -4.43  | -20.41 | 26.285 | -4.245  | -20.335 | LA                     |
| 400 | adult     | No effect        | -29.74 | -32.67 | -12.8  | -37.21 | -24.81 | -12.7  | 33.475 | -28.74  | -12.75  | Hipp                   |
| 400 | adult     | Apnea            | -20.12 | -10.05 | -23.81 | -28.86 | -5.75  | -24.57 | 24.49  | -7.9    | -24.19  | LA/BL/Hipp             |
| 403 | adult     | No effect        | -33.81 | 8.41   | -13.92 | -44.17 | 8.88   | -12.84 | 38.99  | 8.645   | -13.38  | orbitofrontal          |
| 403 | adult     | No effect        | -28.07 | -7.83  | -25.06 | -30.05 | -7.23  | -24.57 | 29.06  | -7.53   | -24.815 | Hipp                   |
| 403 | adult     | No effect        | -30.05 | -7.23  | -24.57 | -31.84 | -6.81  | -24.3  | 30.945 | -7.02   | -24.435 | WM                     |
| 403 | adult     | No effect        | -31.84 | -6.81  | -24.3  | -33.65 | -6.43  | -24.31 | 32.745 | -6.62   | -24.305 | WM                     |
| 407 | pediatric | Apnea            | 16.28  | -6.57  | -21.27 | 18.73  | -6.58  | -21.15 | 17.505 | -6.575  | -21.21  | BL                     |
| 412 | pediatric | Transient Apnea  | -23.13 | 0.08   | -23.05 | -25.7  | -0.41  | -22.57 | 24.415 | -0.165  | -22.81  | LA                     |
| 412 | pediatric | No effect        | -37.79 | -1.55  | -21.3  | -40.38 | -1.69  | -21.12 | 39.085 | -1.62   | -21.21  | WM                     |
| 413 | adult     | Persistent Apnea | 20.04  | -2.33  | -27.29 | 21.73  | -1.6   | -27.66 | 20.885 | -1.965  | -27.475 | BL                     |
| 416 | adult     | No effect        | -23.17 | -4.54  | -13.2  | -25.34 | -5.51  | -13.02 | 24.255 | -5.025  | -13.11  | BL/BM/CEN/ASTA         |
| 422 | pediatric | Apnea            | 15.12  | -3.89  | -24.38 | 18.15  | -4.53  | -23.87 | 16.635 | -4.21   | -24.125 | BL                     |
| 422 | pediatric | Apnea            | 18.15  | -4.53  | -23.87 | 21.48  | -4.98  | -23.43 | 19.815 | -4.755  | -23.65  | BL                     |
| 422 | pediatric | Apnea            | 21.48  | -4.98  | -23.43 | 24.6   | -5.1   | -22.99 | 23.04  | -5.04   | -23.21  | BL                     |
| 422 | pediatric | Transient Apnea  | 24.6   | -5.1   | -22.99 | 27.41  | -5.07  | -22.46 | 26.005 | -5.085  | -22.725 | BL/LA                  |
| 422 | pediatric | No effect        | 25.43  | -18.21 | -18.26 | 30.78  | -18.77 | -17.83 | 28.105 | -18.49  | -18.045 | Hipp                   |
| 427 | pediatric | Apnea            | -14.66 | -6.42  | -23.38 | -16.93 | -6.78  | -23.23 | 15.795 | -6.6    | -23.305 | BL                     |
| 427 | pediatric | Apnea            | -16.93 | -6.78  | -23.23 | -19.22 | -7.17  | -23.04 | 18.075 | -6.975  | -23.135 | BL                     |
| 427 | pediatric | Transient Apnea  | -19.22 | -7.17  | -23.04 | -21.51 | -7.51  | -22.84 | 20.365 | -7.34   | -22.94  | BL                     |
| 427 | pediatric | No effect        | -14.64 | -13.65 | -22.29 | -20.68 | -14.38 | -20.99 | 17.66  | -14.015 | -21.64  | Hipp                   |
| 427 | pediatric | No effect        | -20.68 | -14.38 | -20.99 | -26.21 | -15.21 | -20.12 | 23.445 | -14.795 | -20.555 | Hipp                   |
| 427 | pediatric | Apnea            | 14.75  | -8.42  | -19.09 | 17.15  | -9.04  | -18.52 | 15.95  | -8.73   | -18.805 | BL/ATA                 |
| 447 | pediatric | No effect        | -13.12 | -11.26 | -18.16 | -15.86 | -10.92 | -17.51 | 14.49  | -11.09  | -17.835 | ATA                    |
| 447 | pediatric | Transient Apnea  | -15.86 | -10.92 | -17.51 | -18.7  | -10.51 | -17.02 | 17.28  | -10.715 | -17.265 | ATA/BL/CMN             |
| 447 | pediatric | Apnea            | -18.7  | -10.51 | -17.02 | -21.66 | -9.73  | -16.7  | 20.18  | -10.12  | -16.86  | CMN/BL/BM              |
| 447 | pediatric | No effect        | -21.66 | -9.73  | -16.7  | -24.66 | -8.64  | -16.52 | 23.16  | -9.185  | -16.61  | BL/BM                  |
| 447 | pediatric | No effect        | -24.66 | -8.64  | -16.52 | -27.56 | -7.67  | -16.52 | 26.11  | -8.155  | -16.52  | BL                     |
| 447 | pediatric | No effect        | -27.56 | -7.67  | -16.52 | -30.29 | -7.06  | -16.78 | 28.925 | -7.365  | -16.65  | BL/lateral to amygdala |
| 447 | pediatric | No effect        | -24.03 | -30.72 | -8.64  | -29.88 | -29.2  | -9.5   | 26.955 | -29.96  | -9.07   | Hipp                   |
| 447 | pediatric | Apnea            | 14.34  | 0.41   | -17.71 | 17.18  | 0.67   | -17.22 | 15.76  | 0.54    | -17.465 | CMN                    |
| 447 | pediatric | Apnea            | 17.18  | 0.67   | -17.22 | 19.93  | 1.05   | -16.92 | 18.555 | 0.86    | -17.07  | CMN                    |
| 447 | pediatric | No effect        | 19.93  | 1.05   | -16.92 | 22.4   | 1.6    | -16.82 | 21.165 | 1.325   | -16.87  | anterior to amygdala   |
| 447 | pediatric | No effect        | 22.4   | 1.6    | -16.82 | 24.67  | 2.29   | -16.95 | 23.535 | 1.945   | -16.885 | anterior to amygdala   |
| 447 | pediatric | No effect        | 24.67  | 2.29   | -16.95 | 27.12  | 2.95   | -17.47 | 25.895 | 2.62    | -17.21  | anterior to amygdala   |
| 447 | pediatric | No effect        | 27.12  | 2.95   | -17.47 | 29.83  | 3.64   | -18.31 | 28.475 | 3.295   | -17.89  | anterior to amygdala   |
| 457 | adult     | Apnea            | -13.45 | -7.88  | -18.99 | -15.69 | -7.78  | -18.65 | 14.57  | -7.83   | -18.82  | ATA/BL                 |

|     |           |                  |        |        |        |        |        |        |        |         |        |        |
|-----|-----------|------------------|--------|--------|--------|--------|--------|--------|--------|---------|--------|--------|
| 457 | adult     | Persistent Apnea | 15.59  | -1.2   | -20.95 | 18.32  | -1.29  | -20.75 | 16.955 | -1.245  | -20.85 | ATA/BL |
| 466 | pediatric | No effect        | 23.74  | -25.97 | -15.29 | 28.06  | -24.08 | -14.75 | 25.9   | -25.025 | -15.02 | Hipp   |
| 466 | pediatric | Persistent Apnea | -16.31 | -2.81  | -21.26 | -18.47 | -2.88  | -21.68 | 17.39  | -2.845  | -21.47 | CMN/BM |
| 466 | pediatric | No effect        | -29.16 | -2.21  | -23.2  | -31.42 | -1.44  | -23.34 | 30.29  | -1.825  | -23.27 | LA     |
| 466 | pediatric | Apnea            | 19.87  | -5.47  | -21.55 | 22.38  | -5.45  | -21.77 | 21.125 | -5.46   | -21.66 | BL     |

MNI coordinates, amygdala nucleus assignment, and respiratory outcome for each stimulated site. Sites involved in persistent apnea are shaded gray for emphasis.\*For mapping to template brain, all coordinates were plotted on the Right hemisphere (i.e. all SiteX values are positive). La, lateral nucleus; BL, basolateral nucleus; BM, basomedial nucleus; CEN, central nucleus; CMN, cortical and medial nuclei; ATA, amygdala transition areas; ASTA, amygdalostriatal transition area; AAA, anterior amygdala area; Hipp, hippocampus; WM, white matter.
